# Supplementary material
Source: PubMed Central journal article supplement (PMC1976573)
Supplement: plntphys_pp.107.100495_4.pdf [file plntphys_pp.107.100495_4.pdf]

## Supplemental data

Figure S1. Complementation of *Medicago truncatula hcl* mutants. (A) A B56 *hcl* mutant root that is transformed with the *MtLYK3* gene and a *DsRED* gene, allowing visual selection for transgenic red fluorescent roots. Six days after inoculation GFP expressing *S. meliloti* (green fluorescence) can be observed in infection threads (arrow) that are formed in transgenic tissue (red fluorescence). (B) A nodule (star) formed on a transgenic W1 *hcl* mutant root, the root nodule is pink indicating that it contains *S. meliloti* that fix nitrogen. (C) The root nodule and root shown in figure S1B visualized under a filter set allowing observation of red fluorescent light. Both nodule and root fluoresce red, which indicates that the tissue is expressing DsRED and thus transgenic. Plants containing 1 or more roots that fluoresce brightly red always contained root nodules. (D) The root nodule and root shown in figure S1B visualized under a filter set allowing observation of green fluorescent light. The central tissue of the root nodule fluoresces intensely green indicating that GFP expressing *S. meliloti* are present. (E) The root nodule shown in figure S1B dissected and visualized by confocal laser scanning microscopy. The central tissue contains cells filled with bacteroids (arrowhead) containing green fluorescent *S. meliloti*. Bars represent 250 micrometer, except in figure S1E where it represents 50 micrometer

Figure S2. Infection of *hcl-4* plants by wild type and *nod* mutant *S. meliloti*. In the upper row of pictures roots of *hcl-4* plants are visualized using bright field microscopy. The roots were co cultivated for 20 days with the *S. meliloti* indicated above. Arrows indicate root nodule primordia. In the lower row of pictures the same roots have been observed using a GFP filter set allowing the visualization of the GFP expressing *S. meliloti*. These infections resulted in the formation *S. meliloti* containing sac-like structures in root hairs. Arrowheads indicate micro colonies and sac-like structures formed within tightly curled root hairs. Bars represent 250 micrometer.

Figure S3. Phylogeny of LysM receptor kinases. The analyses was performed on the LysM receptor kinases from LysM cladeA as described by Zhu and coworkers (Zhu *et al.* 2006). We included the complete LYK2 sequence and repeated the analysis to see whether this would affect the topography of the tree. The topography of the tree does not differ from the one published by Zhu and coworkers except for the clade containing MtLYK2, MtLYK3 and LjNFR1 (shaded red). In our analyses MtLYK2 and MtLYK3 are more similar to each other, while in the analysis by Zhu *et al.*, using only a partial MtLYK2 sequence, MtLYK2 was more similar to LjNFR1 instead. Bootstrap values are represented as percentages. The bar represents the amount of changes per nucleotide. The mRNA sequence and the conceptually translated products of MtLYK2, MtLYK5, LjNFR1b, and LjNFR1c are deposited in the EMBL nucleotide database (BN001116 to BN001119, respectively).

Table S1.

Table shows the amount of identical (I) and similar (S) residues as well as gaps (G) between all LysM receptor kinases analyzed. The values are expressed as percentages as well as absolute values, above and under the diagonal (gray) respectively.

|         | MtLYK1 | MtLYK5 | MtLYK4 | LjNFR1b | MtLYK6 | LjNFR1c | MtLYK7 | MtLYK3 | MtLYK2 | LjNFR1 | AtLYK1 | AtLYK2 |   |
|---------|--------|--------|--------|---------|--------|---------|--------|--------|--------|--------|--------|--------|---|
| MtLYK1  | 624    | 72%    | 64%    | 60%     | 47%    | 48%     | 51%    | 64%    | 56%    | 54%    | 44%    | 24%    | I |
|         | 0      | 81%    | 73%    | 74%     | 63%    | 64%     | 65%    | 73%    | 70%    | 68%    | 60%    | 42%    | S |
|         | 0      | 1%     | 5%     | 2%      | 9%     | 6%      | 6%     | 5%     | 6%     | 6%     | 5%     | 7%     | G |
| MtLYK5  | 454    | 625    | 71%    | 63%     | 52%    | 52%     | 56%    | 48%    | 49%    | 51%    | 47%    | 26%    | I |
|         | 510    | 0      | 81%    | 76%     | 68%    | 67%     | 69%    | 62%    | 63%    | 64%    | 62%    | 44%    | S |
|         | 9      | 0      | 6%     | 2%      | 9%     | 6%      | 6%     | 6%     | 7%     | 7%     | 6%     | 7%     | G |
| MtLYK4  | 401    | 447    | 590    | 60%     | 56%    | 54%     | 55%    | 48%    | 48%    | 50%    | 46%    | 25%    | I |
|         | 460    | 509    | 0      | 74%     | 68%    | 68%     | 69%    | 61%    | 63%    | 63%    | 61%    | 42%    | S |
|         | 36     | 39     | 0      | 6%      | 12%    | 9%      | 9%     | 10%    | 10%    | 10%    | 9%     | 8%     | G |
| LjNFR1b | 381    | 406    | 385    | 630     | 54%    | 56%     | 55%    | 51%    | 50%    | 51%    | 48%    | 24%    | I |
|         | 473    | 485    | 469    | 0       | 69%    | 70%     | 70%    | 66%    | 66%    | 66%    | 64%    | 42%    | S |
|         | 16     | 15     | 44     | 0       | 10%    | 6%      | 5%     | 5%     | 6%     | 5%     | 5%     | 7%     | G |
| MtLYK6  | 301    | 334    | 348    | 345     | 574    | 68%     | 60%    | 51%    | 49%    | 51%    | 50%    | 27%    | I |
|         | 401    | 430    | 424    | 439     | 0      | 78%     | 73%    | 64%    | 64%    | 65%    | 65%    | 43%    | S |
|         | 60     | 63     | 76     | 64      | 0      | 5%      | 9%     | 9%     | 10%    | 10%    | 9%     | 9%     | G |
| LjNFR1c | 305    | 333    | 343    | 357     | 412    | 600     | 62%    | 52%    | 52%    | 53%    | 50%    | 27%    | I |
|         | 409    | 429    | 425    | 449     | 473    | 0       | 75%    | 67%    | 67%    | 67%    | 64%    | 44%    | S |
|         | 42     | 43     | 58     | 44      | 32     | 0       | 5%     | 7%     | 8%     | 8%     | 7%     | 7%     | G |
| MtLYK7  | 328    | 363    | 355    | 358     | 381    | 391     | 620    | 54%    | 53%    | 54%    | 53%    | 27%    | I |
|         | 420    | 450    | 439    | 453     | 462    | 473     | 0      | 69%    | 69%    | 69%    | 69%    | 42%    | S |
|         | 40     | 43     | 62     | 38      | 58     | 36      | 0      | 3%     | 5%     | 3%     | 4%     | 9%     | G |
| MtLYK3  | 411    | 315    | 312    | 332     | 322    | 335     | 344    | 620    | 80%    | 77%    | 53%    | 25%    | I |
|         | 473    | 404    | 396    | 427     | 408    | 429     | 440    | 0      | 90%    | 86%    | 69%    | 42%    | S |
|         | 38     | 43     | 68     | 34      | 62     | 50      | 22     | 0      | 1%     | 1%     | 2%     | 8%     | G |
| MtLYK2  | 361    | 316    | 309    | 325     | 311    | 331     | 336    | 503    | 612    | 77%    | 53%    | 26%    | I |
|         | 449    | 411    | 399    | 426     | 406    | 429     | 440    | 561    | 0      | 86%    | 68%    | 44%    | S |
|         | 44     | 49     | 64     | 40      | 66     | 54      | 32     | 10     | 0      | 2%     | 3%     | 7%     | G |
| LjNFR1  | 350    | 330    | 322    | 334     | 323    | 340     | 345    | 483    | 486    | 621    | 53%    | 26%    | I |
|         | 438    | 414    | 405    | 427     | 410    | 428     | 442    | 541    | 543    | 0      | 70%    | 45%    | S |
|         | 39     | 46     | 69     | 37      | 63     | 51      | 23     | 7      | 17     | 0      | 2%     | 7%     | G |
| AtLYK1  | 287    | 306    | 293    | 312     | 317    | 321     | 339    | 337    | 332    | 335    | 617    | 27%    | I |
|         | 387    | 401    | 392    | 411     | 409    | 410     | 438    | 437    | 430    | 440    | 0      | 44%    | S |
|         | 37     | 44     | 63     | 37      | 57     | 45      | 29     | 15     | 21     | 16     | 0      | 7%     | G |
| AtLYK2  | 158    | 166    | 156    | 160     | 171    | 169     | 177    | 159    | 169    | 169    | 176    | 601    | I |
|         | 268    | 282    | 266    | 273     | 269    | 277     | 275    | 273    | 281    | 290    | 283    | 0      | S |
|         | 49     | 50     | 53     | 51      | 59     | 45      | 59     | 51     | 49     | 48     | 50     | 0      | G |

## References

**Zhu H, Riely BK, Burns NJ, Ane JM** (2006) Tracing nonlegume orthologs of legume genes required for nodulation and arbuscular mycorrhizal symbioses. *Genetics* **172**: 2491-2499
