# Supplementary material
Source: PubMed Central journal article supplement (PMC1976573)

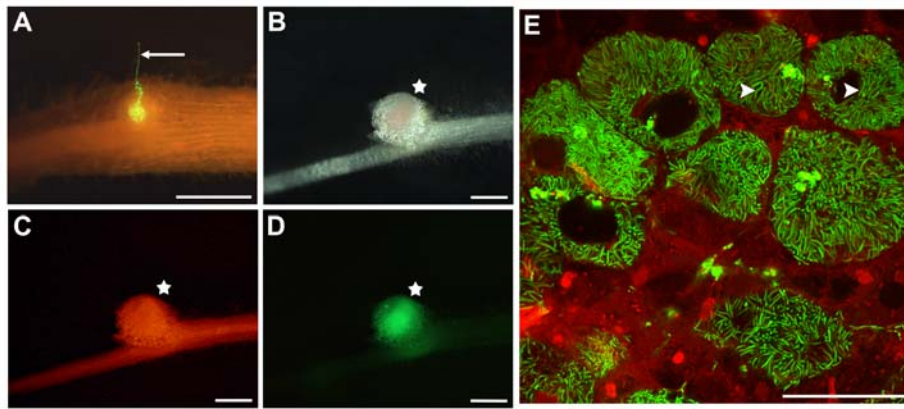

Supplement: plntphys_pp.107.100495_1.pdf [file plntphys_pp.107.100495_1.pdf]

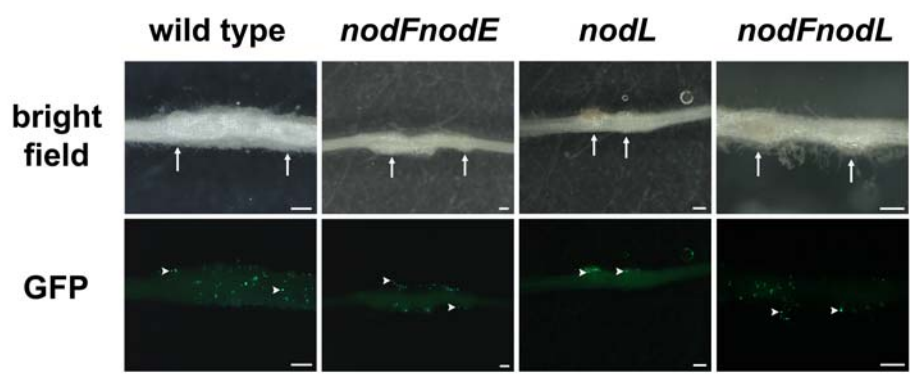

Supplement: plntphys_pp.107.100495_2.pdf [file plntphys_pp.107.100495_2.pdf]

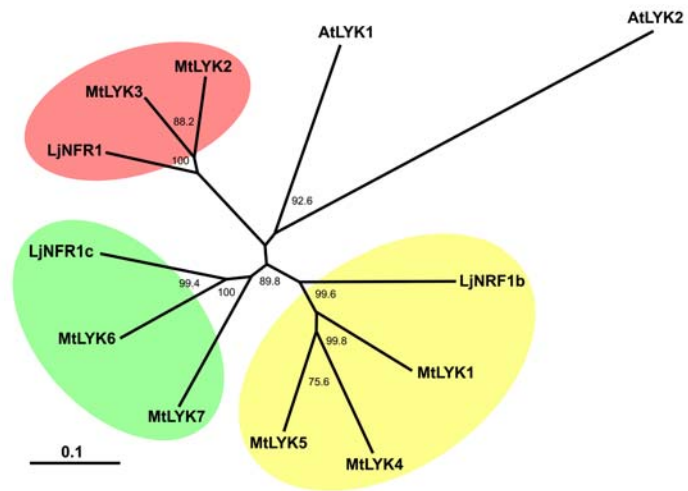

Supplement: plntphys_pp.107.100495_3.pdf [file plntphys_pp.107.100495_3.pdf]
